# Supplementary material
Source: HighWire-hosted journal article supplement (https://rmdopen.bmj.com/content/5/2/e000950)
Supplement: inline-supplementary-material-2 [file inline-supplementary-material-2.docx]

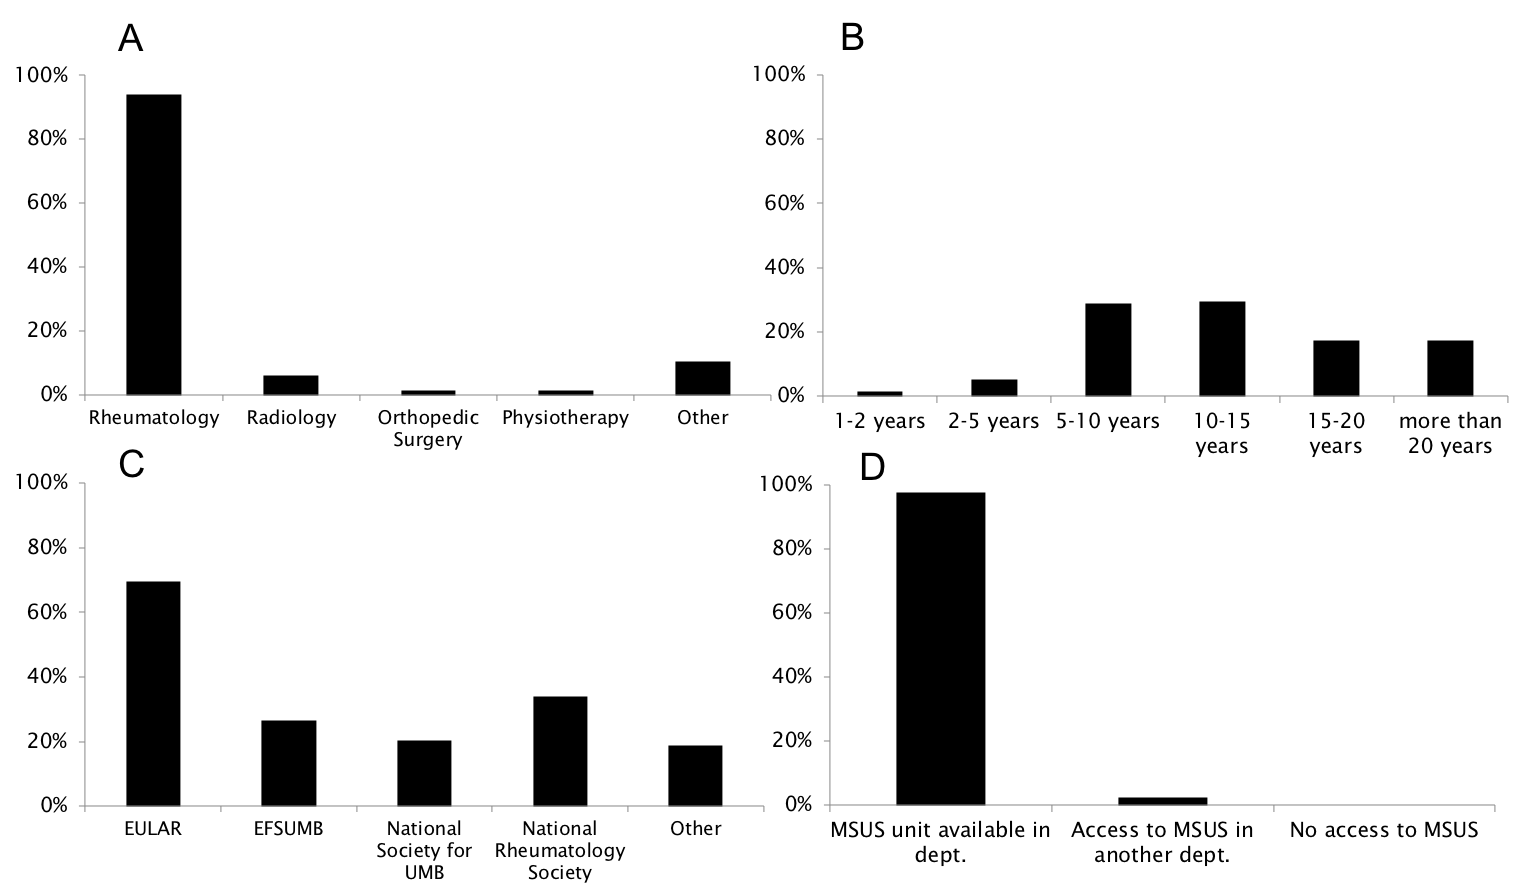


**Supplementary Figure 2.** Characteristics of respondents participating in the survey on musculoskeletal ultrasound. A: specialty; B: years of experience performing musculoskeletal ultrasound; C: certification in musculoskeletal ultrasound; D: availability of musculoskeletal ultrasound for the rheumatology department; EFSUMB: European Federation of Societies for Ultrasound in Medicine and Biology; EULAR: European League Against Rheumatism; MSUS: musculoskeletal ultrasound; UMB: Ultrasound in Medicine and Biology
