# Supplementary material
Source: HighWire-hosted journal article supplement (https://rmdopen.bmj.com/content/5/2/e000950)
Supplement: inline-supplementary-material-3 [file inline-supplementary-material-3.docx]

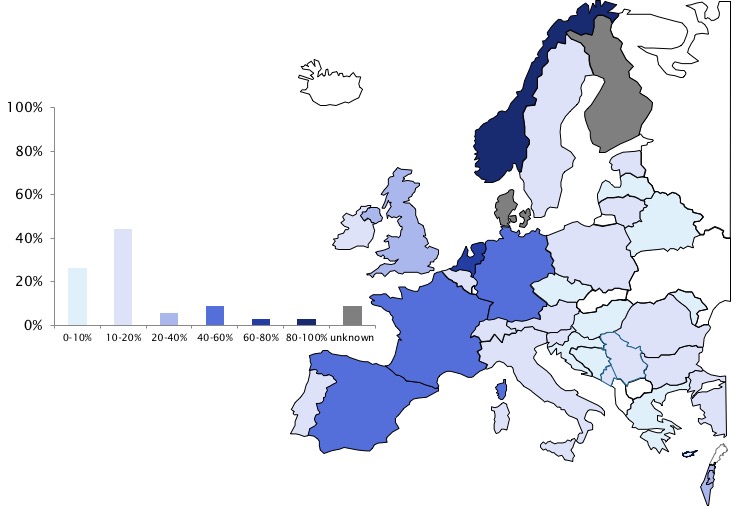


**Supplementary Figure 5.** Percentage of rheumatologists performing ultrasound-guided musculoskeletal interventions among member countries of the European League Against Rheumatism
