# Supplementary material
Source: HighWire-hosted journal article supplement (https://rmdopen.bmj.com/content/5/2/e000950)
Supplement: inline-supplementary-material-4 [file inline-supplementary-material-4.docx]

**
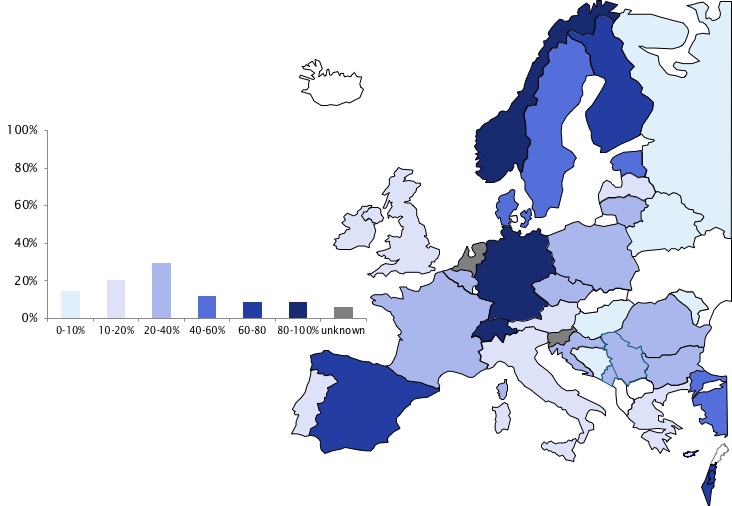
**

**Supplementary Figure 6.** Percentage of rheumatologists trained in musculoskeletal ultrasound among member countries of the European League Against Rheumatism
