# Supplementary material
Source: HighWire-hosted journal article supplement (https://rmdopen.bmj.com/content/5/2/e000950)
Supplement: inline-supplementary-material-5 [file inline-supplementary-material-5.docx]

**
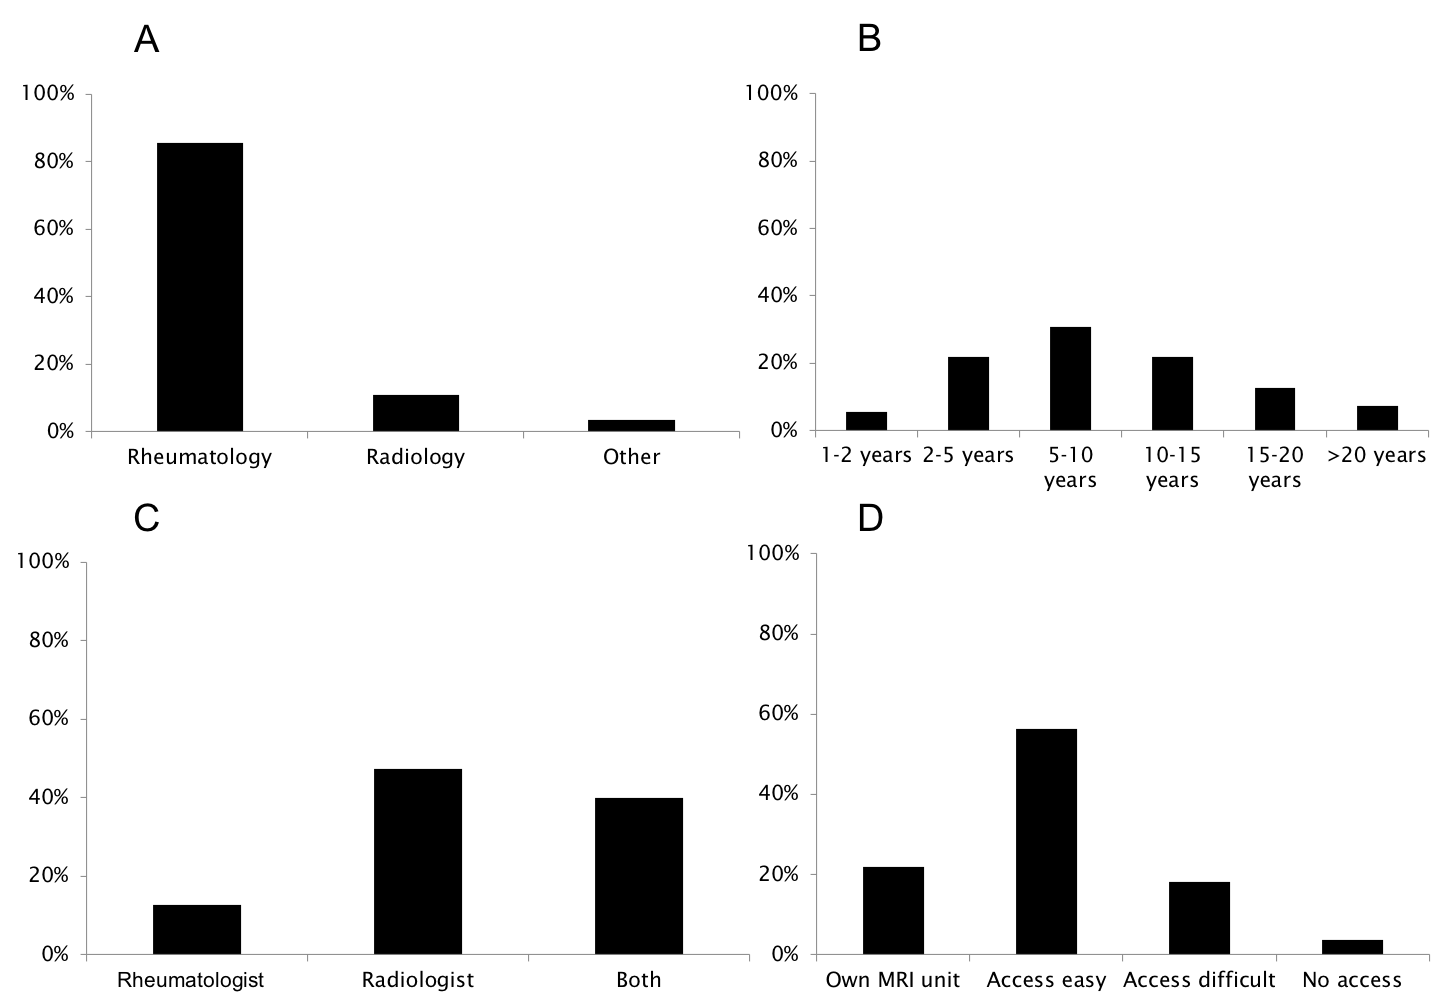
Supplementary Figure 7.** Characteristics of respondents participating in the survey on magnetic resonance imaging. A: specialty; B: years of experience performing magnetic resonance imaging; C: specialist reading the magnetic resonance imaging image; D: availability of magnetic resonance imaging for the rheumatology department; MRI: magnetic resonance imaging
