# Supplementary material
Source: HighWire-hosted journal article supplement (https://rmdopen.bmj.com/content/5/2/e000950)
Supplement: inline-supplementary-material-7 [file inline-supplementary-material-7.docx]

**
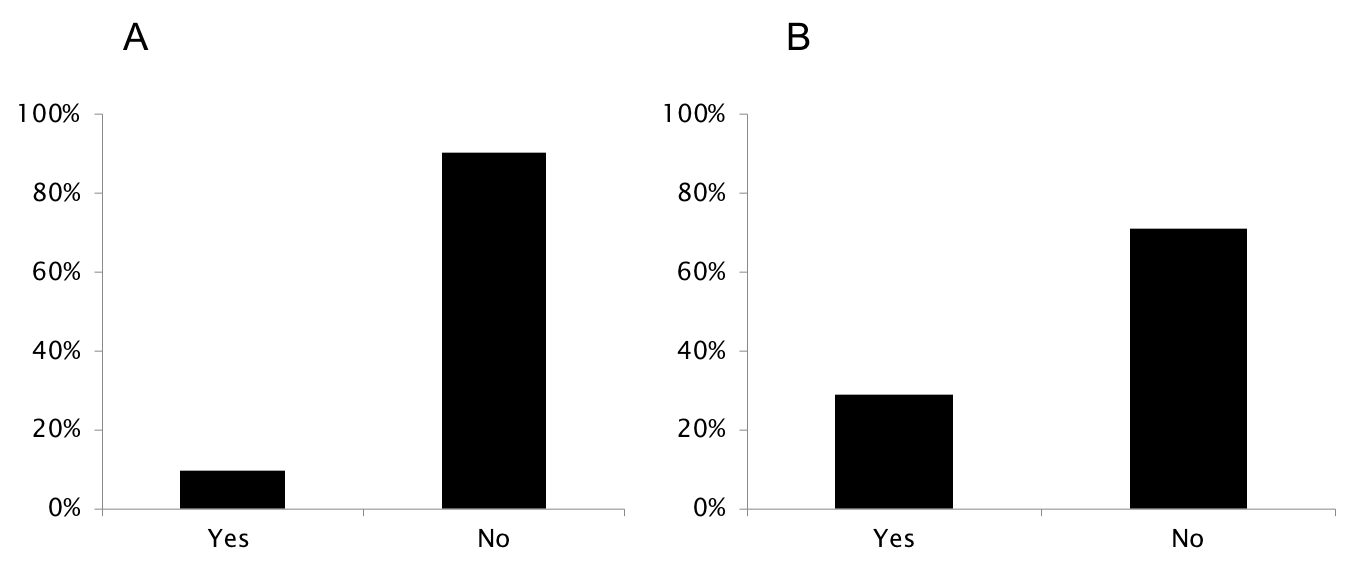
**

**Supplementary Figure 9.** Training opportunities in magnetic resonance imaging among member countries of the European League Against Rheumatism participating in the survey. A: inclusion of training in magnetic resonance imaging in the national training curricula for rheumatologists; B: training course(s) in magnetic resonance imaging organized by the national rheumatology society
