# Supplementary material
Source: HighWire-hosted journal article supplement (https://rmdopen.bmj.com/content/5/2/e000950)
Supplement: inline-supplementary-material-8 [file inline-supplementary-material-8.docx]

**
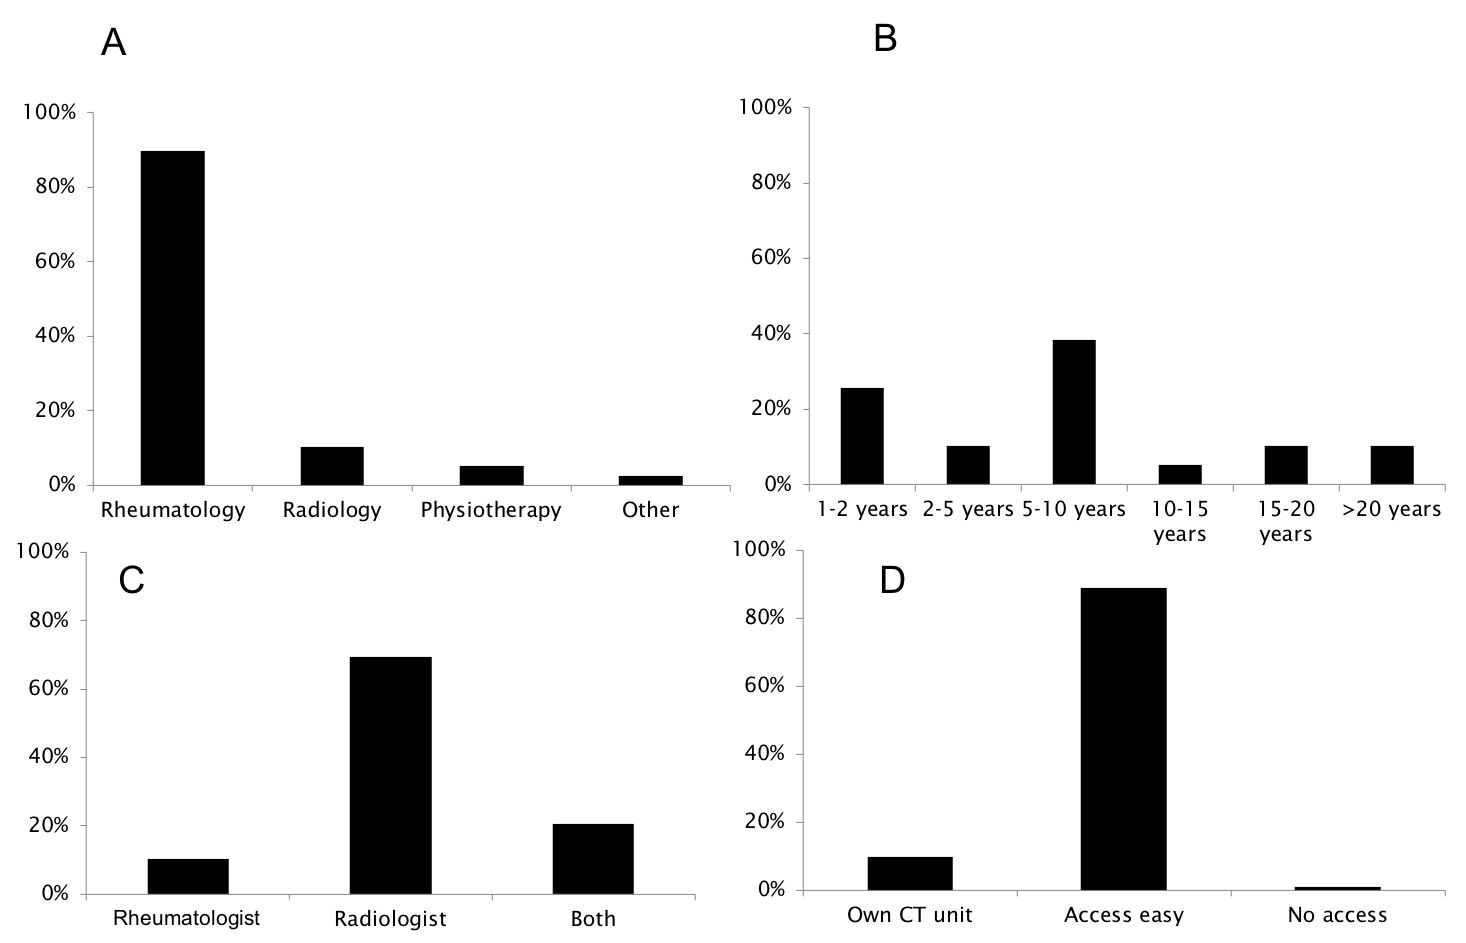
**

**Supplementary Figure 10.** Characteristics of respondents participating in the survey on computed tomography. A: specialty; B: years of experience performing computed tomography; C: specialist reading the computed tomography image; D: availability of computed tomography for the rheumatology department; CT: computed tomography
