# Supplementary material
Source: HighWire-hosted journal article supplement (https://rmdopen.bmj.com/content/5/2/e000950)
Supplement: inline-supplementary-material-10 [file inline-supplementary-material-10.docx]

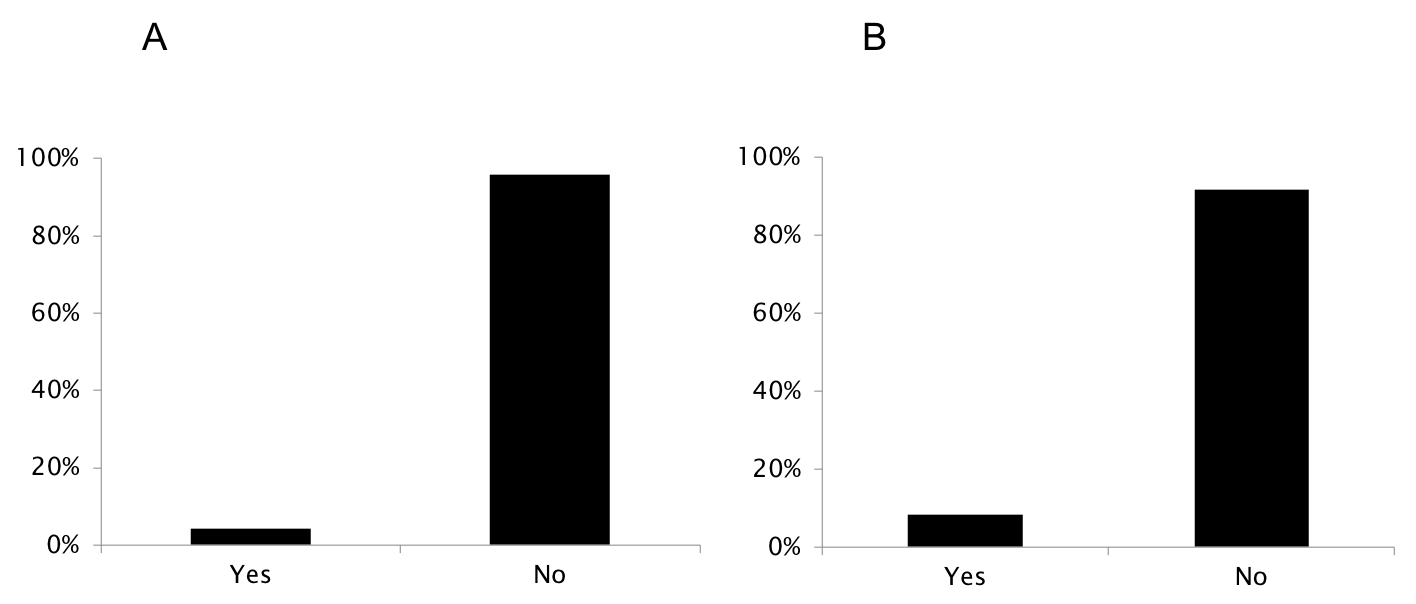


**Supplementary Figure 12.** Training opportunities in computed tomography among member countries of the European League Against Rheumatism participating in the survey. A: inclusion of training in computed tomography in the national training curricula for rheumatologists; B: training course(s) in computed tomography organized by the national rheumatology society
