# Supplementary material
Source: HighWire-hosted journal article supplement (https://rmdopen.bmj.com/content/5/2/e000950)
Supplement: inline-supplementary-material-11 [file inline-supplementary-material-11.docx]

**
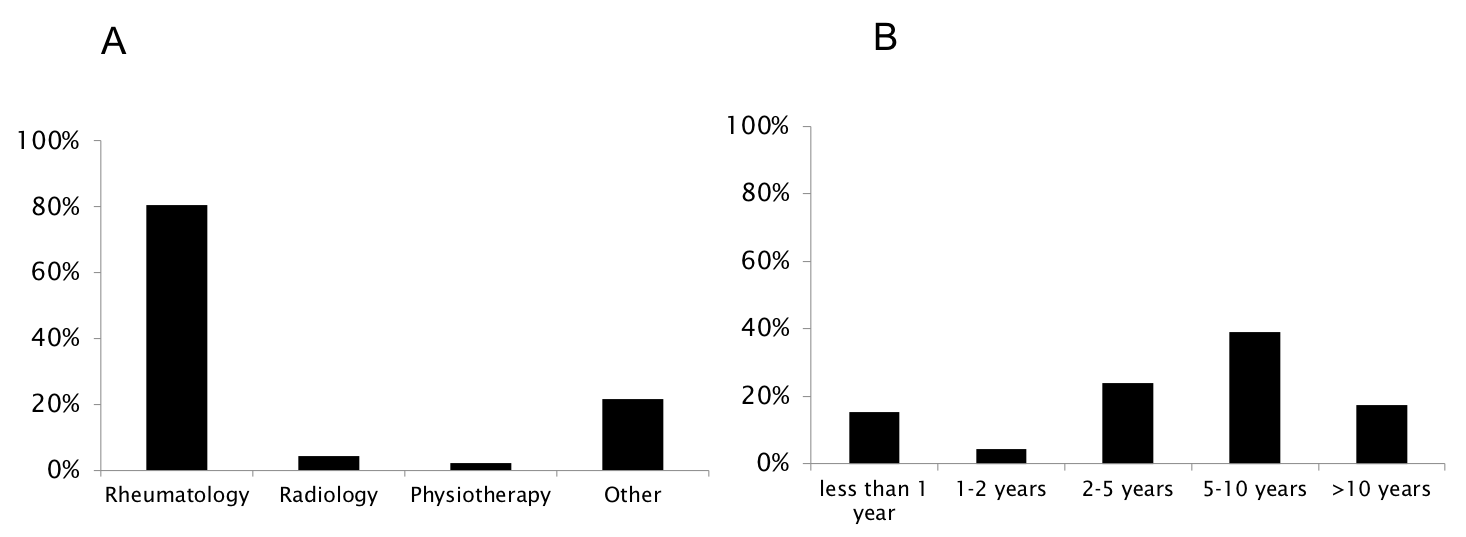
**

**Supplementary Figure 13.** Characteristics of respondents participating in the survey on positron emission tomography. A: specialty; B: years of experience performing positron emission tomography;
