# Supplementary material
Source: HighWire-hosted journal article supplement (https://rmdopen.bmj.com/content/5/2/e000950)

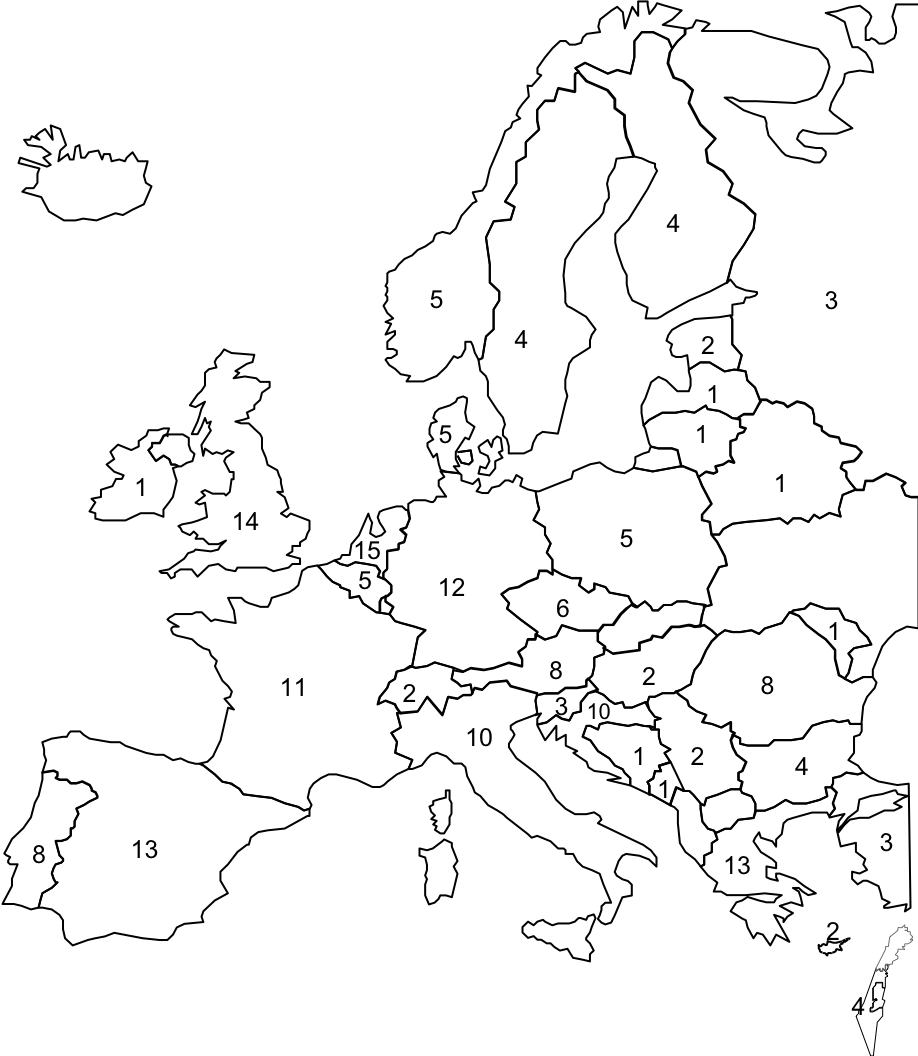


**Supplementary figure 1.** Distribution of respondents according to country

Supplement: inline-supplementary-material-1 [file inline-supplementary-material-1.docx]
